# Supplementary material
Source: PubMed Central journal article supplement (PMC4293726)
Supplement: DS_10.1177_0022034514533126.pdf [file DS_10.1177_0022034514533126.pdf]

M. Cáceres<sup>1\*</sup>, A. Oyarzun<sup>2</sup>, and P.C. Smith<sup>3</sup>

<sup>1</sup>Molecular and Cell Biology Program, Facultad de Medicina, Universidad de Chile, Santiago, Chile; <sup>2</sup>Faculty of Dentistry, Universidad Finis Terrae, Santiago, Chile; and <sup>3</sup>School of Dentistry, Facultad de Medicina, Pontificia Universidad Católica de Chile, Santiago, Chile; \*corresponding author, monicacaceres@med.uchile.cl

*J Dent Res* DOI: 10.1177/0022034514533126

## Defective Wound-healing in Aging Gingival Tissue

### APPENDIX

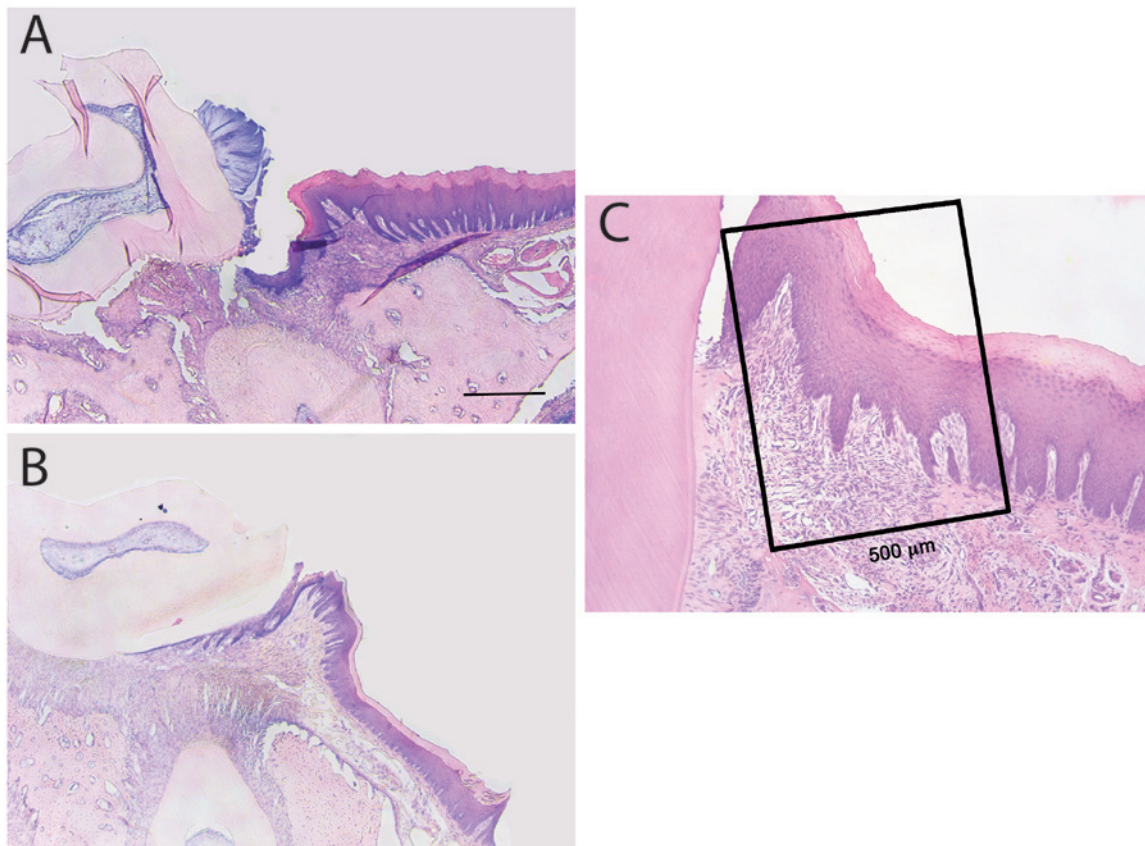

**Appendix Figure.** Wound-healing features of gingival tissues. **(A)** Histological section of wounded tissues 2 days after injury. Giemsa staining. Bar equals 100 μm. **(B)** Histological section of wounded tissues 14 days after injury. Giemsa staining. **(C)** Histological section of wounded tissues 7 days after injury. Giemsa staining. Square indicates the area defined to quantify the percentage of epithelial and connective tissue growth after injury.
